# Supplementary material for: Methyltransferase Set7/9 Maintains Transcription and Euchromatin Structure at Islet-Enriched Genes
Source: Oxford University Press journal article supplement (doi:10.2337/db08-1150), 2008-11-05
Supplement: db08-11501_suppl.doc [file db08-11501_suppl.doc]

**
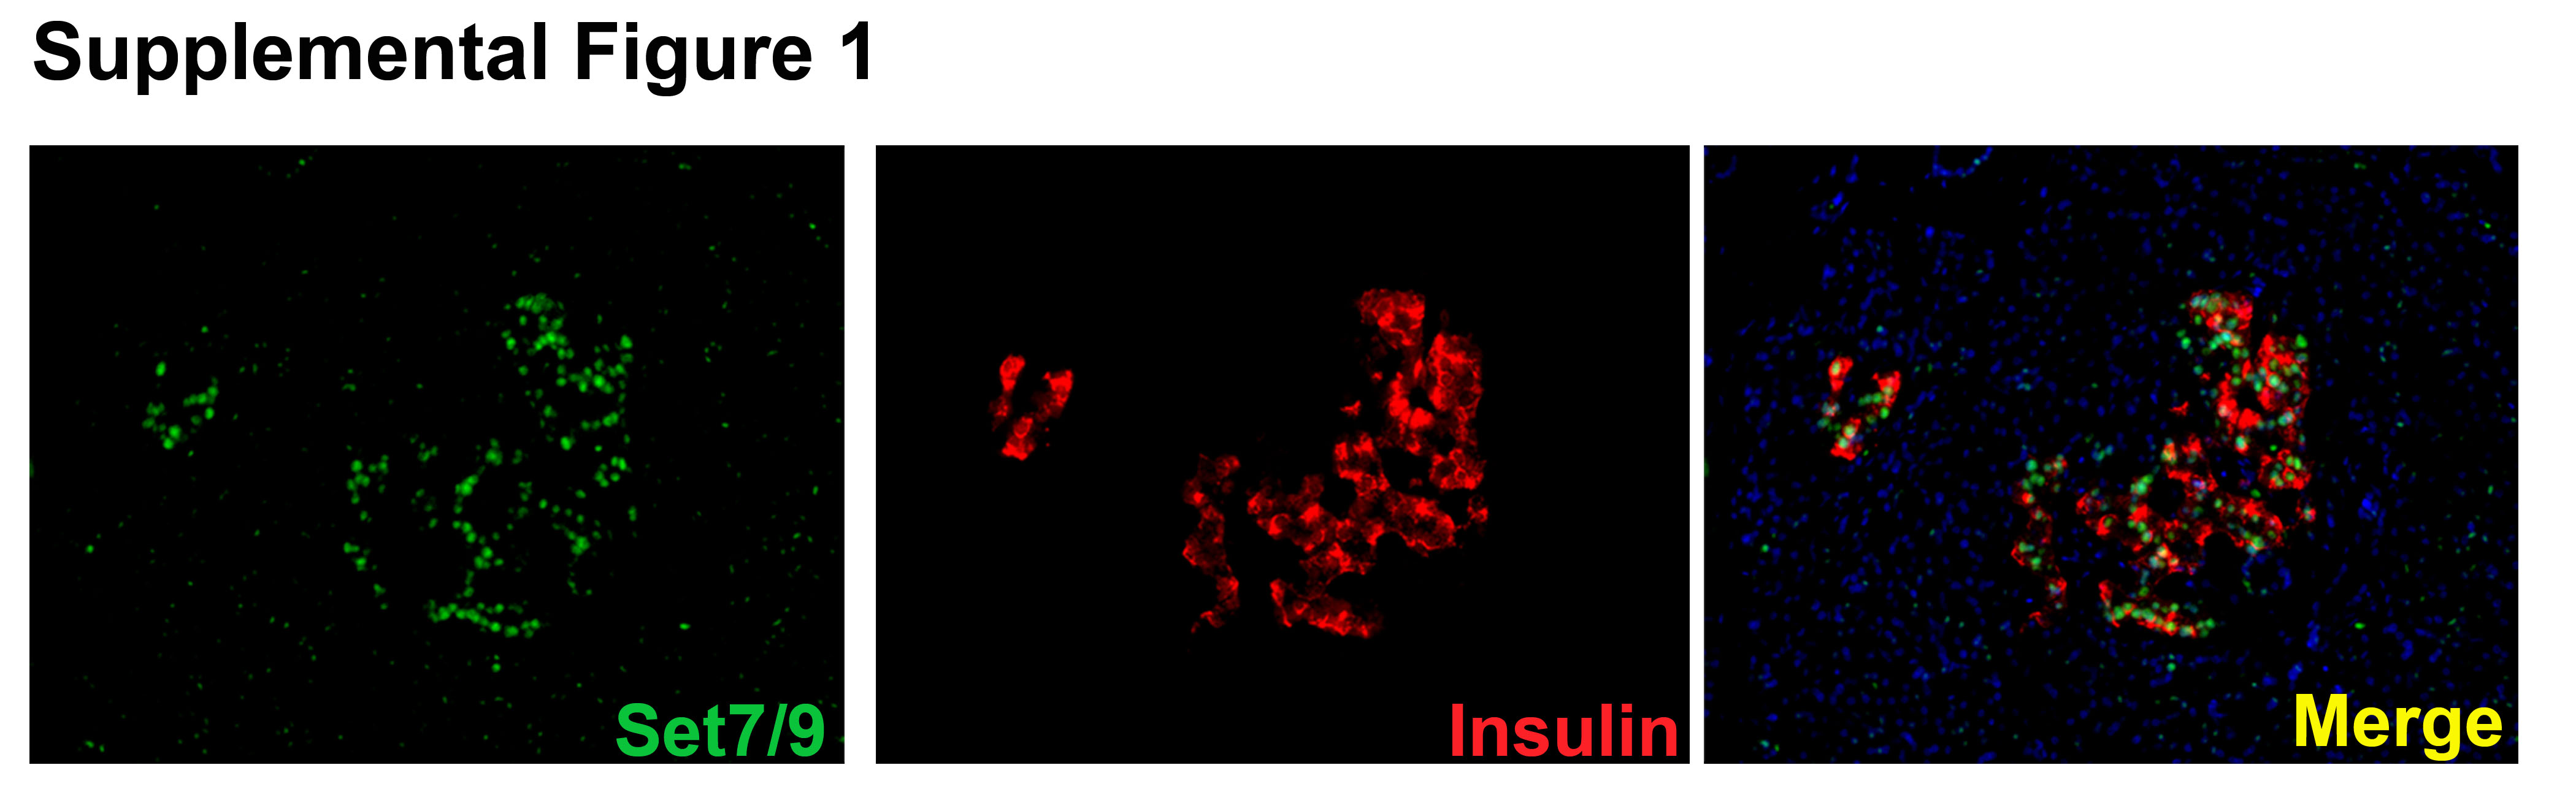
**

**Supplemental Fig. S1. Expression of Set7/9 protein in human pancreas.** Human pancreas was fixed and fluorescence immunostaining was performed using primary antibodies to Set7/9 (*green color*) and insulin (*red color*). The *Merge* panel also shows counterstaining of nuclei (*blue color*) using DAPI dye.

**
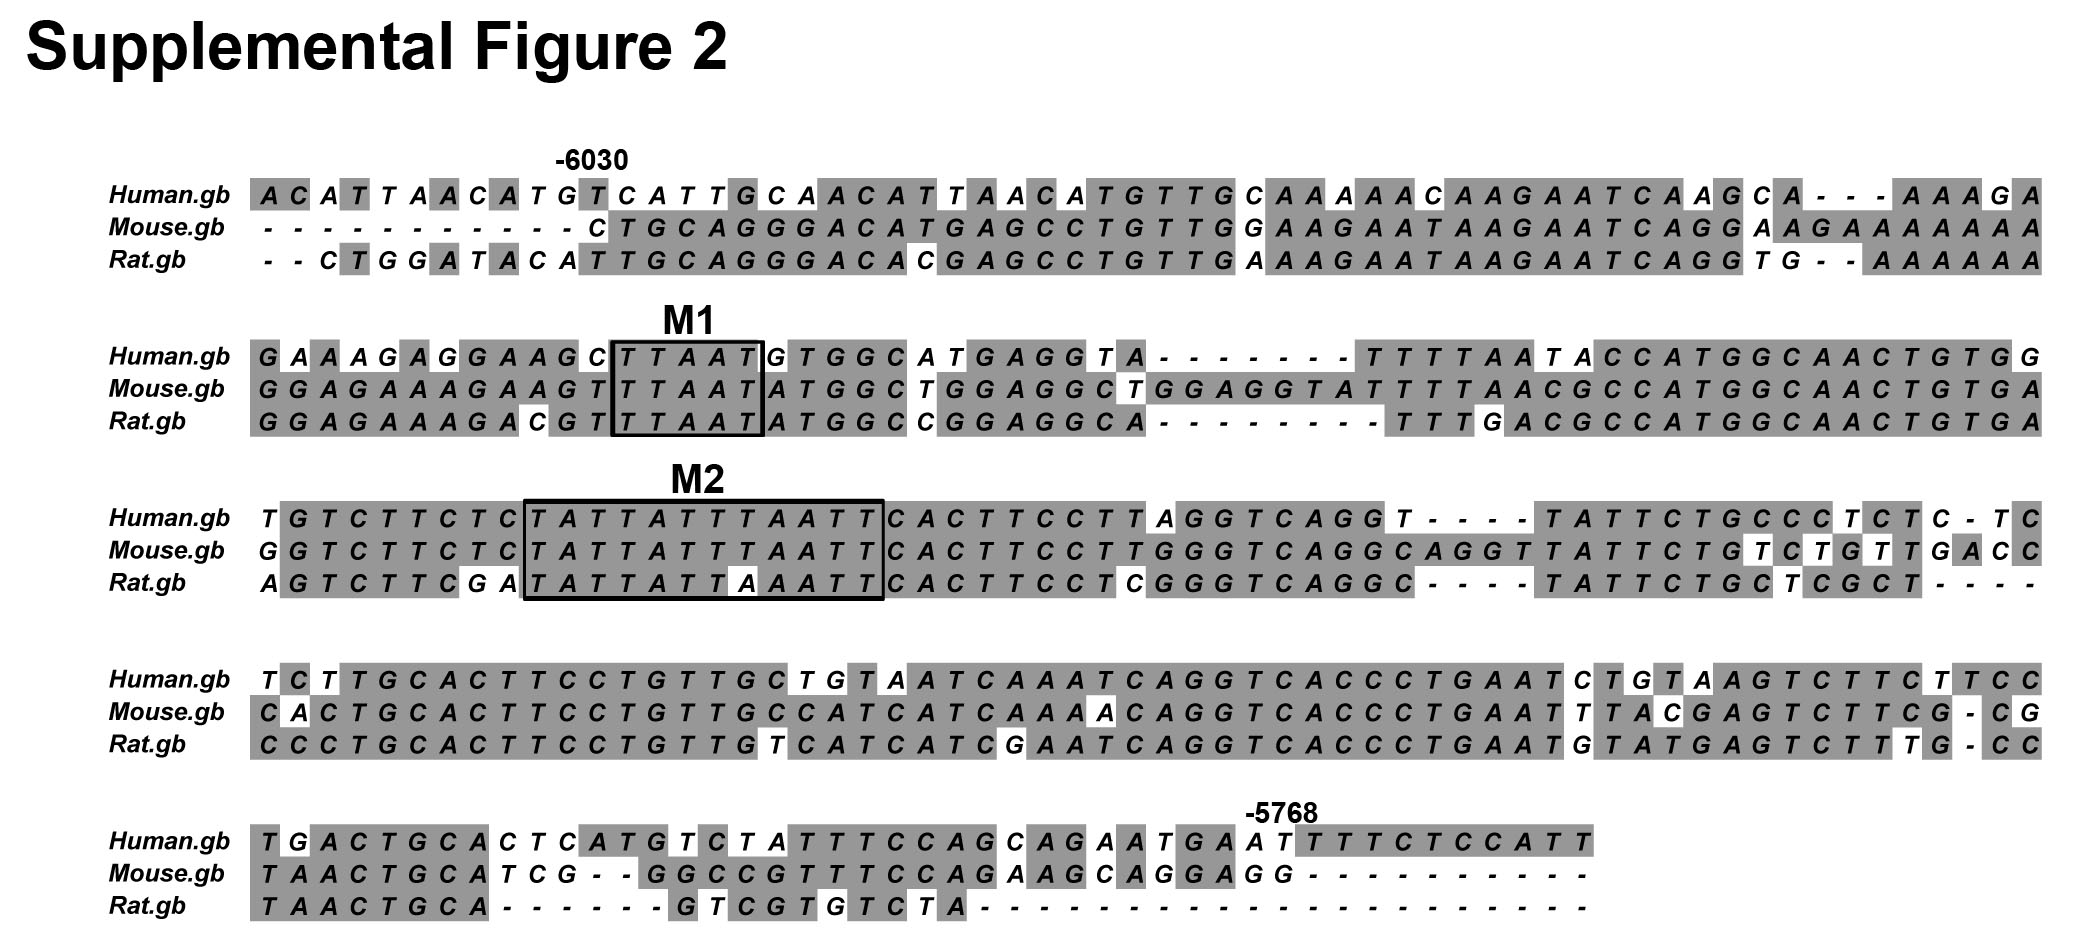
**

**Supplemental Fig. S2. Alignment of the sequences of the human, mouse, and rat *Setd7* genes.** Aligment of the respective genes between positions -5768 bp to -6030 bp (relative to the transcriptional start site of the mouse gene) are shown, indicating potential Pdx1 binding sites that were mutated (M1 and M2). Alignment was performed using the ClustalW algorithm.
